# Supplementary material
Source: PubMed Central journal article supplement (PMC5468752)
Supplement: NIHMS862411-supplement-1.pdf [file NIHMS862411-supplement-1.pdf]

## **Locoregional effects of microbiota in a preclinical model of colon carcinogenesis**

Sarah Tomkovich<sup>1,2</sup>, Ye Yang<sup>1</sup>, Kathryn Winglee<sup>5</sup>, Josee Gauthier<sup>1</sup>, Marcus Mühlbauer<sup>1</sup>, Xiaolun Sun<sup>1</sup>, Mansour Mohamadzadeh<sup>§</sup>, Xiuli Liu<sup>6</sup>, Patricia Martin<sup>3,4</sup>, Gary P. Wang<sup>7</sup>, Eric Oswald<sup>3,4</sup>, Anthony A. Fodor<sup>5</sup> and Christian Jobin<sup>1§\*</sup>

<sup>1</sup>Department of Medicine, <sup>§</sup>Department of Infectious Diseases and Pathology, University of Florida, Gainesville, FL 32611, USA. <sup>2</sup>Department of Microbiology and Immunology, University of North Carolina at Chapel Hill, Chapel Hill, NC 27713, USA. <sup>3</sup>IRSD, Université de Toulouse, INSERM, INRA, ENVT, UPS, Toulouse, France. <sup>4</sup>CHU Toulouse, Service de Bactériologie-Hygiène, Toulouse, France. <sup>5</sup>Department of Bioinformatics and Genomics, University of North Carolina at Charlotte, North Carolina 28223, United States. <sup>6</sup>Department of Pathology, Immunology, and Laboratory Medicine, University of Florida, Gainesville, FL 32611, USA. <sup>7</sup>Department of Medicine, Division of Infectious Diseases and Global Medicine, University of Florida, Gainesville, FL 32611, USA. \*Corresponding author

## Supplementary Materials and Methods

### 16S rRNA sequencing analysis

The forward and reverse reads were stitched together using fastq-join (1). Taxonomic ranks were assigned for the stitched reads using the RDP (ribosomal database project) classifier (2) version 2.2 with confidence set to 80%. Reads were grouped by genera and the counts were normalized and  $\log_{10}$  transformed (3) using the following formula:

$$\log_{10} \left( \frac{RC}{n} \times \frac{\sum x}{N} + 1 \right)$$

where RC is the read count for a particular OTU in a particular sample,  $n$  is the total number of reads in that sample, the sum of  $x$  is the total number of reads in all samples and  $N$  is the total number of samples. The Principle Coordinate Analysis (PCoA) was generated from the Bray-Curtis distance of the normalized and  $\log_{10}$  transformed counts using the capscale function in the vegan R package (4,5).

Genera significantly associated with colon tumor number or combined inflammation score were detected using the gls function in the R nlme package, with the REML method (6) to fit a generalized mixed linear model of the form:

$$\text{genera} \sim \text{variable} + 1 | \text{cage} + \varepsilon$$

where genera indicates the  $\log_{10}$  normalized abundance of a particular genera, variable indicates either the number of colon tumors or the combined inflammation score and 1|cage indicates that we used the cage as a random effect. We filtered genera absent in more than a quarter of the samples. We then ran an ANOVA analysis on the above model to generate p-values for each variable. The p-values for cage were calculated using an ANOVA to compare this model and a model with the cage removed (genera ~

variable +  $\epsilon$ ). The p-values were then adjusted for multiple hypothesis testing using the method of Benjamini & Hochberg (7). The Spearman correlation was calculated using the R function cor (5) with x as the number of colon tumors or the combined inflammation score and y as  $\log_{10}$  normalized genera abundance. The code and tables used to generate the 16S rRNA sequencing figure and supplementary table can be found at: <https://github.com/afodor/apcmin>.

## References

1. Aronesty E. ea-utils : “Command-line tools for processing biological sequencing data” [Internet]. 2011 [cited 2016 Nov 4]. Available from: <https://github.com/ExpressionAnalysis/ea-utils>
2. Wang Q, Garrity GM, Tiedje JM, Cole JR. Naive Bayesian classifier for rapid assignment of rRNA sequences into the new bacterial taxonomy. *Appl Environ Microbiol*. 2007;73:5261–7.
3. McCafferty J, Mühlbauer M, Gharaibeh RZ, Arthur JC, Perez-Chanona E, Sha W, et al. Stochastic changes over time and not founder effects drive cage effects in microbial community assembly in a mouse model. *ISME J*. 2013;7:2116–25.
4. Oksanen JB, Guillaume F, Kindt R, Legendre P, Minchin PR, O’Hara RB, et al. *vegan: Community Ecology Package*. 2015.
5. R Core Team. *R: A Language and Environment for Statistical Computing*. R Foundation for Statistical Computing; 2015.
6. Pinheiro J, Bates D, DebRoy S, Sarkar D, R Core Team. *nlme: Linear and Nonlinear Mixed Effects Models*. 2016.
7. Benjamini Y, Hochberg Y. Controlling the false discovery rate: a practical and powerful approach to multiple testing. *Journal of the Royal Statistical Society Series B (Methodological)*. 1995;57:289–300.

## Supplementary Figure S1.

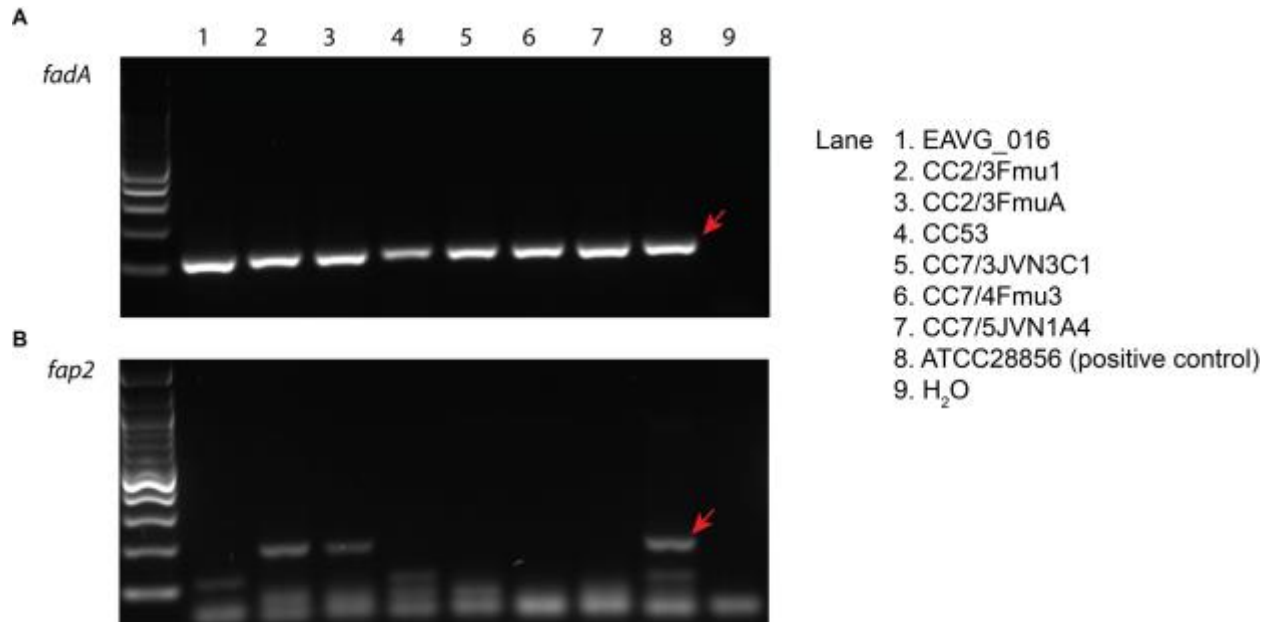

**Supplementary Figure S1.** PCR detection of *F. nucleatum* adhesins. **A-B)** Detection of the *fadA* (**A**) and *fap2* (**B**) adhesins in tested *F. nucleatum* strains.

## Supplementary Figure S2.

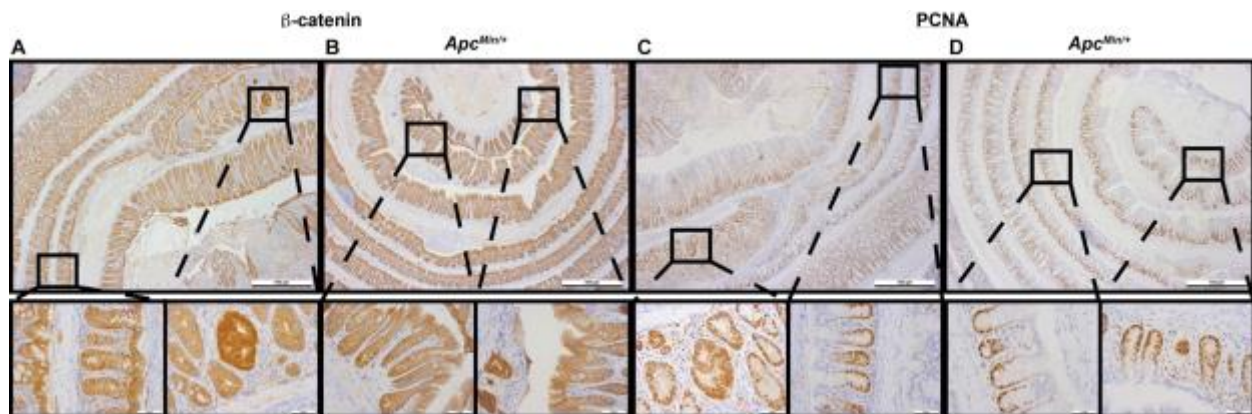

**Supplementary Figure S2.**  $Apc^{Min/+}; Il10^{-/-}$  mice have increased colon proliferation. **A-B)** CTNNB1 immunohistochemistry (IHC) from 30-40 week old SPF  $Apc^{Min/+}; Il10^{-/-}$  (**A**) and  $Apc^{Min/+}$  (**B**) colons. **C-D)** PCNA IHC from SPF  $Apc^{Min/+}; Il10^{-/-}$  (**C**) and  $Apc^{Min/+}$  (**D**) colons. Higher magnification of both dysplastic and normal regions are shown for SPF  $Apc^{Min/+}; Il10^{-/-}$  mice.

### Supplementary Figure S3.

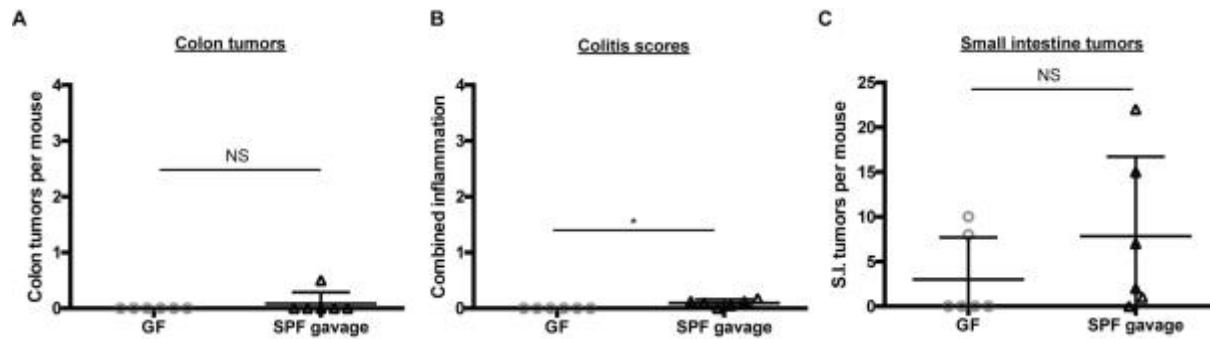

**Supplementary Figure S3.** Bacteria do not promote colon inflammation and tumorigenesis in *Apc<sup>Min/+</sup>* mice. **A-C)** Colon macroscopic tumor counts (**A**), colitis scores (**B**), and small intestine tumor counts (**C**) from GF (n=6) and SPF gavaged (n=6) *Apc<sup>Min/+</sup>* mice. Data are expressed as mean +/- standard deviation with \*p< 0.05, or NS: not significant (p> 0.05) shown.

## Supplementary Figure S4.

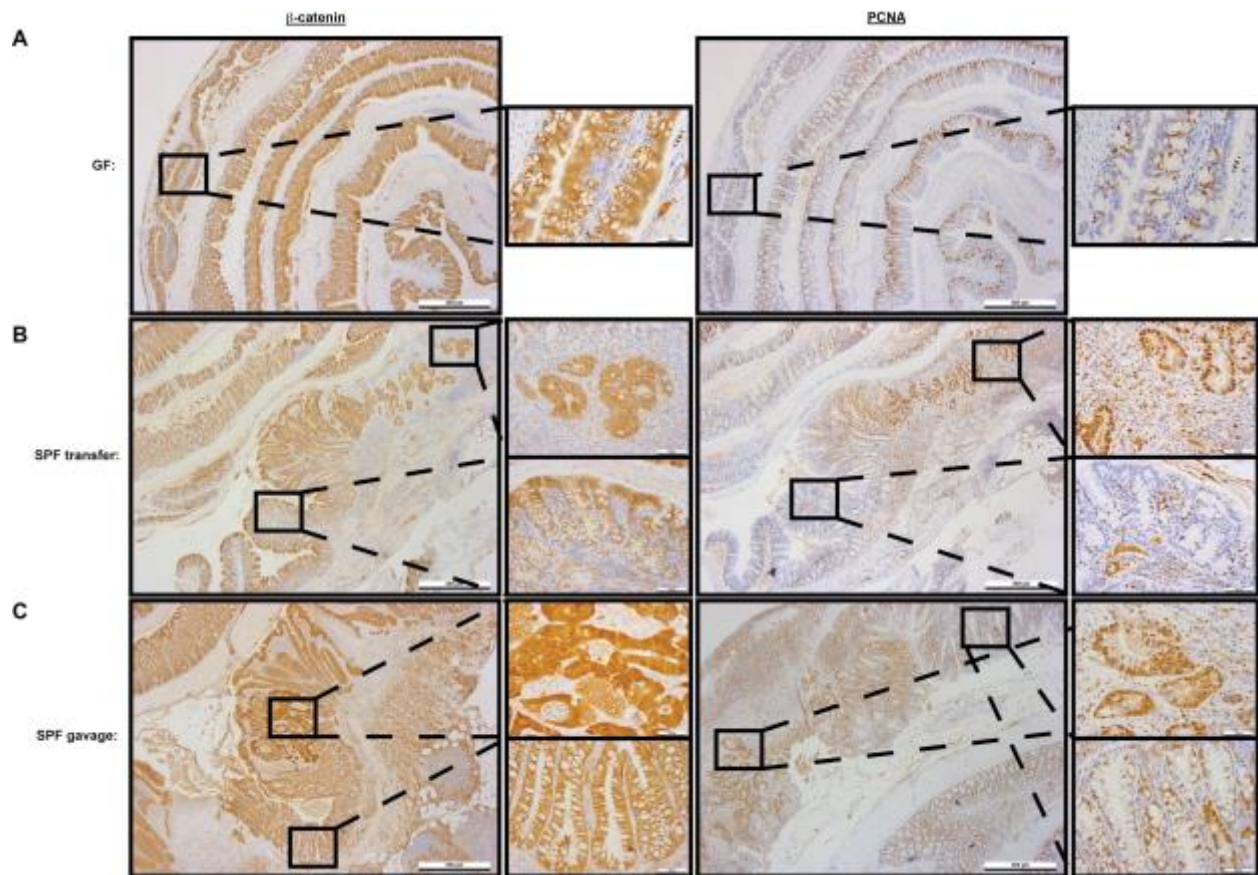

**Supplementary Figure S4.** Microbiota promote proximal colon proliferation in *Apc<sup>Min/+</sup>; Il10<sup>-/-</sup>* mice. **A-C** β-catenin and PCNA IHC from GF (**A**), SPF transferred (**B**), and SPF gavaged (**C**) *Apc<sup>Min/+</sup>; Il10<sup>-/-</sup>* proximal colons. Higher magnification of both dysplastic and normal regions are shown for SPF transfer and gavage *Apc<sup>Min/+</sup>; Il10<sup>-/-</sup>* mice.

### Supplementary Figure S5.

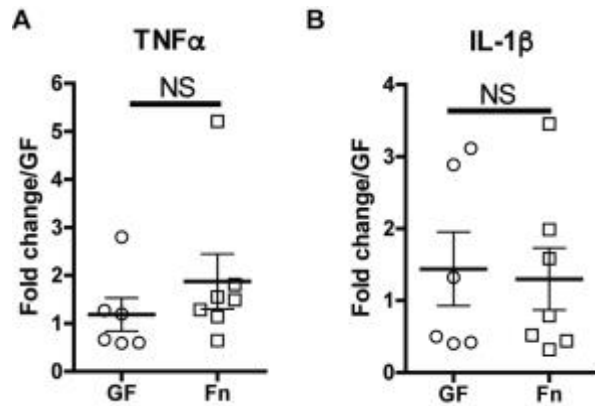

**Supplementary Figure S5.** Colibactin promotes CRC development in AOM//110<sup>-/-</sup> mice.

Colon tumor counts in 20 week *E. coli* NC101 (n=6) or  $\Delta clbP$  (n=5) mono-associated AOM//110<sup>-/-</sup> mice. Data are expressed as mean  $\pm$  standard deviation with \*p < 0.05.



**Supplementary Table S2. V1-V3 MiSeq Primers**

| Name        | Sequence                                                                                     |
|-------------|----------------------------------------------------------------------------------------------|
| PE1_27F-1   | AATGATACGGCGACCACCGAGATCTACACTCTTTCCCTACACGACGCTCTTCCGATCT <b>AGTA</b> AAGAGTTTGATCCTGGCTCAG |
| PE1_27F-2   | AATGATACGGCGACCACCGAGATCTACACTCTTTCCCTACACGACGCTCTTCCGATCT <b>TCAT</b> AGAGTTTGATCCTGGCTCAG  |
| PE1_27F-3   | AATGATACGGCGACCACCGAGATCTACACTCTTTCCCTACACGACGCTCTTCCGATCT <b>GTCT</b> AGAGTTTGATCCTGGCTCAG  |
| PE1_27F-4   | AATGATACGGCGACCACCGAGATCTACACTCTTTCCCTACACGACGCTCTTCCGATCT <b>TCAAG</b> AGAGTTTGATCCTGGCTCAG |
| PE1_27F-5   | AATGATACGGCGACCACCGAGATCTACACTCTTTCCCTACACGACGCTCTTCCGATCT <b>CTGAT</b> AGAGTTTGATCCTGGCTCAG |
| PE2_534R-1  | CAAGCAGAAGACGGCATAACGAGATCGGCATTCCTGCTGAACCGCTCTTCCGATCT <b>AAGC</b> ATTACCGCGGCTGCTGG       |
| PE2_534R-2  | CAAGCAGAAGACGGCATAACGAGATCGGCATTCCTGCTGAACCGCTCTTCCGATCT <b>TACC</b> ATTACCGCGGCTGCTGG       |
| PE2_534R-3  | CAAGCAGAAGACGGCATAACGAGATCGGCATTCCTGCTGAACCGCTCTTCCGATCT <b>CTAC</b> ATTACCGCGGCTGCTGG       |
| PE2_534R-4  | CAAGCAGAAGACGGCATAACGAGATCGGCATTCCTGCTGAACCGCTCTTCCGATCT <b>GTG</b> AGTATTACCGCGGCTGCTGG     |
| PE2_534R-5  | CAAGCAGAAGACGGCATAACGAGATCGGCATTCCTGCTGAACCGCTCTTCCGATCT <b>TAG</b> CTATTACCGCGGCTGCTGG      |
| PE2_534R-6  | CAAGCAGAAGACGGCATAACGAGATCGGCATTCCTGCTGAACCGCTCTTCCGATCT <b>ATGA</b> ATTACCGCGGCTGCTGG       |
| PE2_534R-7  | CAAGCAGAAGACGGCATAACGAGATCGGCATTCCTGCTGAACCGCTCTTCCGATCT <b>GTAG</b> TGATTACCGCGGCTGCTGG     |
| PE2_534R-8  | CAAGCAGAAGACGGCATAACGAGATCGGCATTCCTGCTGAACCGCTCTTCCGATCT <b>CTAT</b> GCGATTACCGCGGCTGCTGG    |
| PE2_534R-9  | CAAGCAGAAGACGGCATAACGAGATCGGCATTCCTGCTGAACCGCTCTTCCGATCT <b>GTACT</b> GATTACCGCGGCTGCTGG     |
| PE2_534R-10 | CAAGCAGAAGACGGCATAACGAGATCGGCATTCCTGCTGAACCGCTCTTCCGATCT <b>CTACT</b> GATTACCGCGGCTGCTGG     |
| PE2_534R-11 | CAAGCAGAAGACGGCATAACGAGATCGGCATTCCTGCTGAACCGCTCTTCCGATCT <b>CTAG</b> AGCTATTACCGCGGCTGCTGG   |
| PE2_534R-12 | CAAGCAGAAGACGGCATAACGAGATCGGCATTCCTGCTGAACCGCTCTTCCGATCT <b>ATG</b> CATGTATTACCGCGGCTGCTGG   |
| PE2_534R-13 | CAAGCAGAAGACGGCATAACGAGATCGGCATTCCTGCTGAACCGCTCTTCCGATCT <b>TTAT</b> CGTGATTACCGCGGCTGCTGG   |
| PE2_534R-14 | CAAGCAGAAGACGGCATAACGAGATCGGCATTCCTGCTGAACCGCTCTTCCGATCT <b>GTAT</b> ACATCATTACCGCGGCTGCTGG  |
| PE2_534R-15 | CAAGCAGAAGACGGCATAACGAGATCGGCATTCCTGCTGAACCGCTCTTCCGATCT <b>GTAT</b> CAGCATATTACCGCGGCTGCTGG |
| PE2_534R-16 | CAAGCAGAAGACGGCATAACGAGATCGGCATTCCTGCTGAACCGCTCTTCCGATCT <b>TTAG</b> TCACGATTACCGCGGCTGCTGG  |
| PE2_534R-17 | CAAGCAGAAGACGGCATAACGAGATCGGCATTCCTGCTGAACCGCTCTTCCGATCT <b>ATCG</b> AGTGCATTACCGCGGCTGCTGG  |
| PE2_534R-18 | CAAGCAGAAGACGGCATAACGAGATCGGCATTCCTGCTGAACCGCTCTTCCGATCT <b>GTACC</b> ACTATTACCGCGGCTGCTGG   |

**Unique barcode in red.**

**Supplementary Table S2. Spearman correlations and corresponding p values from linear models used to generate Figure 3.**

| Genus                    | Colon Tumor Number Spearman Correlation | P-value for Colon Tumor Number | P-value for Cage in Mixed Model with Colon Tumor Number | Adjusted P-value for Colon Tumor Number | Adjusted P-value for Cage in Mixed Model with Colon Tumor Number | Combined Inflammation Score Spearman Correlation | P-value for Combined Inflammation Score | P-value for Cage in Mixed Model with Inflammation Score | Adjusted P-value for Combined Inflammation Score | Adjusted P-value for Cage in Mixed Model with Inflammation Score |
|--------------------------|-----------------------------------------|--------------------------------|---------------------------------------------------------|-----------------------------------------|------------------------------------------------------------------|--------------------------------------------------|-----------------------------------------|---------------------------------------------------------|--------------------------------------------------|------------------------------------------------------------------|
| <i>Akkermansia</i>       | 0.35                                    | 0.0175                         | 7.37E-08                                                | 0.0379                                  | 2.87E-07                                                         | 0.36                                             | 0.1848                                  | 4.94E-07                                                | 0.2325                                           | 1.48E-06                                                         |
| <i>Alistipes</i>         | -0.03                                   | 0.0444                         | 1.38E-13                                                | 0.0693                                  | 1.80E-12                                                         | 0.02                                             | 0.0094                                  | 4.90E-14                                                | 0.0194                                           | 6.36E-13                                                         |
| <i>Allobaculum</i>       | 0.35                                    | 2.08E-08                       | 0.0013                                                  | 8.10E-07                                | 0.0019                                                           | 0.27                                             | 0.0019                                  | 0.0027                                                  | 0.0049                                           | 0.0036                                                           |
| <i>Anaeroplasma</i>      | -0.21                                   | 0.0938                         | 1.38E-07                                                | 0.1307                                  | 4.90E-07                                                         | -0.26                                            | 0.1074                                  | 2.13E-07                                                | 0.1551                                           | 7.54E-07                                                         |
| <i>Anaerostipes</i>      | -0.40                                   | 0.0192                         | 0.0028                                                  | 0.0395                                  | 0.0039                                                           | -0.46                                            | 0.0002                                  | 0.0084                                                  | 0.0009                                           | 0.0109                                                           |
| <i>Anaerotruncus</i>     | -0.42                                   | 0.0014                         | 0.1940                                                  | 0.0062                                  | 0.2162                                                           | -0.32                                            | 0.0003                                  | 0.0409                                                  | 0.0013                                           | 0.0489                                                           |
| <i>Anaerovorax</i>       | 0.18                                    | 0.8389                         | 2.10E-05                                                | 0.8389                                  | 4.31E-05                                                         | -0.04                                            | 0.0500                                  | 5.02E-06                                                | 0.0813                                           | 1.15E-05                                                         |
| <i>Bacteroides</i>       | 0.36                                    | 0.8199                         | 0                                                       | 0.8389                                  | 0                                                                | 0.29                                             | 0.6818                                  | 0                                                       | 0.7386                                           | 0                                                                |
| <i>Barnesiella</i>       | 0.03                                    | 0.6268                         | 0.0001                                                  | 0.6607                                  | 0.0003                                                           | 0.04                                             | 0.9242                                  | 0.0002                                                  | 0.9485                                           | 0.0003                                                           |
| <i>Bifidobacterium</i>   | 0.18                                    | 0.1295                         | 0.0008                                                  | 0.1742                                  | 0.0012                                                           | 0.12                                             | 0.3854                                  | 0.0014                                                  | 0.4294                                           | 0.0020                                                           |
| <i>Blautia</i>           | 0.15                                    | 0.0044                         | 6.84E-08                                                | 0.0123                                  | 2.87E-07                                                         | 0.28                                             | 5.07E-05                                | 8.45E-09                                                | 0.0003                                           | 3.71E-08                                                         |
| <i>Butyricoccus</i>      | -0.27                                   | 0.0171                         | 3.78E-06                                                | 0.0379                                  | 9.22E-06                                                         | -0.32                                            | 0.0052                                  | 1.26E-06                                                | 0.0112                                           | 3.27E-06                                                         |
| <i>Butyrivibrio</i>      | -0.65                                   | 5.75E-05                       | 4.03E-05                                                | 0.0004                                  | 7.48E-05                                                         | -0.52                                            | 0.0002                                  | 1.86E-05                                                | 0.0009                                           | 3.81E-05                                                         |
| <i>Clostridium IV</i>    | -0.43                                   | 5.68E-05                       | 2.10E-06                                                | 0.0004                                  | 6.26E-06                                                         | -0.40                                            | 1.47E-05                                | 3.91E-07                                                | 0.0002                                           | 1.27E-06                                                         |
| <i>Clostridium XI</i>    | 0.52                                    | 0.0012                         | 0.0001                                                  | 0.0056                                  | 0.0003                                                           | 0.46                                             | 0.0008                                  | 0.0002                                                  | 0.0026                                           | 0.0003                                                           |
| <i>Clostridium XIVa</i>  | -0.29                                   | 0.0228                         | 0.1387                                                  | 0.0434                                  | 0.1591                                                           | -0.26                                            | 0.0016                                  | 0.1370                                                  | 0.0045                                           | 0.1522                                                           |
| <i>Clostridium XIVb</i>  | -0.45                                   | 0.0245                         | 1.17E-06                                                | 0.0434                                  | 3.81E-06                                                         | -0.39                                            | 1.59E-05                                | 8.55E-09                                                | 0.0002                                           | 3.71E-08                                                         |
| <i>Clostridium XVIII</i> | -0.01                                   | 0.5614                         | 4.28E-10                                                | 0.6081                                  | 2.78E-09                                                         | 0.17                                             | 0.1435                                  | 5.81E-10                                                | 0.1930                                           | 3.24E-09                                                         |

|                                           |       |          |          |          |          |       |          |          |          |          |
|-------------------------------------------|-------|----------|----------|----------|----------|-------|----------|----------|----------|----------|
| <i>Coprobacillus</i>                      | 0.19  | 0.0237   | 4.39E-08 | 0.0434   | 2.14E-07 | 0.17  | 0.1271   | 1.16E-07 | 0.1771   | 4.52E-07 |
| <i>Coprococcus</i>                        | -0.19 | 0.1928   | 0.0466   | 0.2425   | 0.0551   | -0.22 | 0.0490   | 0.0414   | 0.0813   | 0.0489   |
| <i>Dorea</i>                              | 0.29  | 0.0138   | 0.0264   | 0.0336   | 0.0332   | 0.30  | 0.0161   | 0.0519   | 0.0298   | 0.0595   |
| <i>Enterococcus</i>                       | 0.61  | 8.03E-06 | 0.0002   | 7.83E-05 | 0.0004   | 0.40  | 0.0003   | 0.0002   | 0.0013   | 0.0003   |
| <i>Enterorhabdus</i>                      | -0.50 | 0.0419   | 2.52E-06 | 0.0693   | 6.55E-06 | -0.43 | 0.0049   | 6.31E-07 | 0.0112   | 1.76E-06 |
| <i>Erysipelotrichaceae incertae sedis</i> | -0.20 | 0.5089   | 0.0034   | 0.5670   | 0.0046   | -0.10 | 0.3202   | 0.0012   | 0.3785   | 0.0017   |
| <i>Escherichia/Shigella</i>               | 0.35  | 0.0016   | 3.90E-05 | 0.0062   | 7.48E-05 | 0.18  | 0.0999   | 2.72E-05 | 0.1498   | 5.31E-05 |
| <i>Flavonifractor</i>                     | -0.19 | 0.1593   | 1.54E-11 | 0.2071   | 1.50E-10 | -0.14 | 0.0004   | 3.48E-13 | 0.0013   | 3.39E-12 |
| <i>Lachnoanaerobaculum</i>                | -0.46 | 0.0017   | 0.9284   | 0.0062   | 0.9284   | -0.33 | 0.0050   | 0.9352   | 0.0112   | 0.9352   |
| <i>Lachnospiracea incertae sedis</i>      | -0.51 | 0.0022   | 1.57E-09 | 0.0072   | 8.77E-09 | -0.39 | 0.0012   | 3.06E-10 | 0.0035   | 1.99E-09 |
| <i>Lactobacillus</i>                      | 0.12  | 0.4745   | 7.86E-11 | 0.5443   | 6.13E-10 | 0.18  | 0.9804   | 1.26E-10 | 0.9804   | 9.79E-10 |
| <i>Marvinbryantia</i>                     | -0.51 | 0.0044   | 0.0004   | 0.0123   | 0.0006   | -0.24 | 0.1580   | 0.0001   | 0.2054   | 0.0002   |
| <i>Oscillibacter</i>                      | -0.70 | 3.37E-06 | 0.0454   | 4.39E-05 | 0.0551   | -0.63 | 1.04E-09 | 0.0196   | 4.07E-08 | 0.0246   |
| <i>Pseudoflavonifractor</i>               | -0.61 | 1.03E-06 | 0.5268   | 2.02E-05 | 0.5553   | -0.58 | 5.38E-09 | 0.1405   | 1.05E-07 | 0.1522   |
| <i>Robinsoniella</i>                      | 0.29  | 0.0073   | 3.22E-15 | 0.0189   | 6.28E-14 | 0.15  | 0.0669   | 3.89E-15 | 0.1043   | 7.58E-14 |
| <i>Roseburia</i>                          | -0.18 | 0.0441   | 8.28E-06 | 0.0693   | 1.90E-05 | -0.25 | 0.0134   | 9.60E-06 | 0.0260   | 2.08E-05 |
| <i>Ruminococcus2</i>                      | -0.31 | 0.0866   | 1.62E-05 | 0.1251   | 3.52E-05 | -0.40 | 0.0310   | 8.24E-05 | 0.0550   | 0.0002   |
| <i>Staphylococcus</i>                     | -0.16 | 0.2232   | 0.8027   | 0.2720   | 0.8238   | -0.12 | 0.3724   | 0.6830   | 0.4271   | 0.7010   |
| <i>Streptococcus</i>                      | -0.28 | 0.0745   | 0.3529   | 0.1118   | 0.3823   | -0.23 | 0.2006   | 0.5401   | 0.2445   | 0.5693   |
| <i>Syntrophococcus</i>                    | -0.62 | 0.0001   | 0.0039   | 0.0007   | 0.0051   | -0.49 | 2.57E-05 | 0.0001   | 0.0002   | 0.0002   |
| <i>Turicibacter</i>                       | 0.21  | 0.2970   | 2.25E-06 | 0.3510   | 6.26E-06 | -0.01 | 0.7483   | 2.34E-06 | 0.7887   | 5.70E-06 |

**Supplementary Table S3. Accession numbers for 16S rRNA sequenced *Apc*<sup>Min/+</sup>; *I110*<sup>-/-</sup> stool samples from Figure 3.**

| Sample ID | SRA accession number | number of reads | cage   | colon tumor number | combined inflammation score |
|-----------|----------------------|-----------------|--------|--------------------|-----------------------------|
| 1         | SRR4453219           | 288706          | 54802  | 1                  | 0.5                         |
| 2         | SRR4453218           | 273580          | 637823 | 2                  | 0.875                       |
| 3         | SRR4453243           | 239102          | 51541  | 8                  | 2.875                       |
| 5         | SRR4453220           | 388330          | 52048  | 2                  | 0                           |
| 6         | SRR4453246           | 288676          | 54253  | 8                  | 2.5                         |
| 7         | SRR4453208           | 419434          | 56547  | 15                 | 3.125                       |
| 8         | SRR4453217           | 300654          | 584724 | 2                  | 0.75                        |
| 10        | SRR4453213           | 192538          | 53690  | 1                  | 0.875                       |
| 11        | SRR4453248           | 247728          | 55908  | 3                  | 1.375                       |
| 12        | SRR4453223           | 241112          | 52561  | 3                  | 2.125                       |
| 13        | SRR4453252           | 318654          | 55906  | 1                  | 0.375                       |
| 14        | SRR4453251           | 257246          | 644039 | 22                 | 3.25                        |
| 15        | SRR4453211           | 257872          | 55907  | 0                  | 0.75                        |
| 17        | SRR4453185           | 308250          | 578031 | 7                  | 2.25                        |
| 18        | SRR4453245           | 234064          | 55908  | 3                  | 0.875                       |
| 19        | SRR4453244           | 250950          | 55907  | 0                  | 0.5                         |
| 20        | SRR4453214           | 279160          | 51541  | 1                  | 0.25                        |
| 21        | SRR4453247           | 317838          | 56800  | 2                  | 0                           |
| 22        | SRR4453206           | 224598          | 56800  | 2                  | 1.75                        |
| 23        | SRR4453212           | 232396          | 50925  | 2                  | 0.5                         |
| 25        | SRR4453210           | 266526          | 51542  | 0                  | 0                           |
| 26        | SRR4453216           | 182184          | 50927  | 2                  | 0.5                         |
| 27        | SRR4453241           | 252032          | 54252  | 2                  | 0.5                         |
| 28        | SRR4453242           | 247056          | 54803  | 2                  | 0                           |
| 29        | SRR4453205           | 238380          | 605881 | 6                  | 2.375                       |
| 30        | SRR4453222           | 221232          | 54530  | 5                  | 1.375                       |
| 31        | SRR4453224           | 262342          | 578031 | 13                 | 2.5                         |
| 33        | SRR4453250           | 264660          | 51542  | 0                  | 0.25                        |
| 34        | SRR4453202           | 219824          | 578030 | 2                  | 0                           |
| 35        | SRR4453207           | 139938          | 625434 | 6                  | 2.25                        |
| 36        | SRR4453249           | 247550          | 50927  | 1                  | 0.25                        |
| 37        | SRR4453196           | 207336          | 669929 | 21                 | 3.25                        |
| 38        | SRR4453195           | 211686          | 584724 | 1                  | 2                           |
| 39        | SRR4453194           | 206174          | 55906  | 0                  | 1.75                        |
| 40        | SRR4453201           | 215064          | 56548  | 9                  | 3.25                        |
| 41        | SRR4453200           | 194462          | 56800  | 1                  | 0.5                         |
| 42        | SRR4453199           | 191006          | 50926  | 10                 | 3.875                       |
| 43        | SRR4453198           | 196080          | 50925  | 2                  | 0.625                       |
| 44        | SRR4453204           | 192844          | 54802  | 6                  | 2.75                        |
| 45        | SRR4453203           | 194830          | 55907  | 9                  | 3.5                         |
| 46        | SRR4453235           | 230700          | 56801  | 2                  | 0.375                       |
| 47        | SRR4453236           | 233494          | 52048  | 10                 | 2.5                         |
| 49        | SRR4453215           | 271316          | 50928  | 1                  | 1.875                       |
| 51        | SRR4453221           | 184994          | 52933  | 0                  | 0.375                       |
| 52        | SRR4453239           | 203852          | 52048  | 12                 | 0.75                        |
| 53        | SRR4453240           | 213666          | 55906  | 1                  | 0.25                        |
| 54        | SRR4453237           | 200366          | 637823 | 2                  | 0.375                       |
| 55        | SRR4453238           | 218774          | 54252  | 1                  | 0.25                        |

|                    |            |             |        |      |       |
|--------------------|------------|-------------|--------|------|-------|
| 56                 | SRR4453209 | 190800      | 56548  | 7    | 3.25  |
| 57                 | SRR4453197 | 301744      | 578030 | 0    | 0     |
| 58                 | SRR4453187 | 205868      | 639275 | 6    | 2.25  |
| 59                 | SRR4453186 | 240942      | 54530  | 7    | 2.5   |
| 61                 | SRR4453189 | 207414      | 53690  | 0    | 0.75  |
| 62                 | SRR4453188 | 223306      | 584725 | 2    | 1.1   |
| 63                 | SRR4453191 | 250208      | 52560  | 5    | 1.75  |
| 65                 | SRR4453190 | 283568      | 50928  | 0    | 0.75  |
| 66                 | SRR4453193 | 238832      | 639275 | 4    | 1.625 |
| 67                 | SRR4453192 | 216246      | 605881 | 3    | 1.75  |
| 68                 | SRR4453184 | 290478      | 56548  | 7    | 2.25  |
| 70                 | SRR4453183 | 223168      | 53691  | 1    | 0     |
| 71                 | SRR4453225 | 867326      | 53690  | 2    | 0.5   |
| 72                 | SRR4453226 | 175708      | 54967  | 0    | 0     |
| 73                 | SRR4453227 | 242832      | 584724 | 0    | 1     |
| 74                 | SRR4453228 | 220574      | 54967  | 0    | 0.375 |
| 75                 | SRR4453229 | 218900      | 644039 | 15   | 2.625 |
| 76                 | SRR4453230 | 237422      | 50925  | 6    | 2.5   |
| 77                 | SRR4453231 | 243032      | 54253  | 16   | 1.5   |
| 78                 | SRR4453232 | 210244      | 51542  | 1    | 0.375 |
| 79                 | SRR4453233 | 331504      | 53690  | 2    | 0.75  |
| 80                 | SRR4453234 | 222050      | 605882 | 0    | 0.25  |
| Average            |            | 250163.1714 |        | 4.23 | 1.31  |
| Standard deviation |            | 88400.39565 |        | 5.02 | 1.10  |
